# Supplementary material for: Twin pair analysis uncovers links between DNA methylation, mitochondrial DNA quantity and obesity
Source: Springer Nature journal article supplement (doi:10.1038/s41467-025-59576-7), 2025-05-12
Supplement: MOESM1 [file 41467_2025_59576_MOESM1_ESM.pdf]

## Supplementary Information

### Twin pair analysis uncovers links between DNA methylation, mitochondrial DNA quantity and obesity

Aino Heikkinen<sup>1,2\*</sup>, Vivienne F C Esser<sup>3</sup>, Seung Hyuk T Lee<sup>4</sup>, Sara Lundgren<sup>1</sup>, Antti Hakkarainen<sup>5</sup>, Jesper Lundbom<sup>5,6</sup>, Juho Kuula<sup>5,7</sup>, Per-Henrik Groop<sup>8,9,10</sup>, Sini Heinonen<sup>11,12</sup>, Sergio Villicaña<sup>13</sup>, Jordana T Bell<sup>13</sup>, Alice Maguolo<sup>14</sup>, Emma Nilsson<sup>14</sup>, Charlotte Ling<sup>14</sup>, Allan Vaag<sup>15,16,17</sup>, Päivi Pajukanta<sup>4,18,19</sup>, Jaakko Kaprio<sup>1</sup>, Kirsi H Pietiläinen<sup>11,20</sup>, Shuai Li<sup>3,21</sup> & Miina Ollikainen<sup>1,2\*</sup>

<sup>1</sup> Institute for Molecular Medicine Finland (FIMM), HiLIFE, University of Helsinki, Helsinki, Finland

<sup>2</sup> Minerva Foundation Institute for Medical Research, Helsinki, Finland

<sup>3</sup> Centre for Epidemiology and Biostatistics, Melbourne School of Population and Global Health, University of Melbourne, Melbourne, VIC, Australia

<sup>4</sup> Department of Human Genetics, David Geffen School of Medicine at UCLA, Los Angeles, CA, USA

<sup>5</sup> HUS Medical Imaging Center, Radiology, University of Helsinki and Helsinki University Hospital, Helsinki, Finland

<sup>6</sup> Institute for Clinical Diabetology, German Diabetes Center, Leibniz Center for Diabetes Research, Heinrich Heine University, Düsseldorf, Germany

<sup>7</sup> Public Health Promotion Unit, National Institute for Health and Welfare, Helsinki, Finland.

<sup>8</sup> Folkhälsan Institute of Genetics, Folkhälsan Research Center, Helsinki, Finland

<sup>9</sup> Research Program for Clinical and Molecular Metabolism, Faculty of Medicine, University of Helsinki, Helsinki, Finland

<sup>10</sup> Abdominal Center, Nephrology, University of Helsinki and Helsinki University Hospital, Helsinki, Finland

<sup>11</sup> Obesity Research Unit, Research Program for Clinical and Molecular Metabolism, Faculty of Medicine, University of Helsinki, Helsinki, Finland

<sup>12</sup> Department of Internal Medicine, Helsinki University Hospital, Helsinki, Finland

<sup>13</sup> Department of Twin Research and Genetic Epidemiology, King's College London, London, UK

<sup>14</sup> Epigenetics and Diabetes Unit, Department of Clinical Sciences in Malmö, Lund University Diabetes Centre, Scania University Hospital, Malmö, Sweden

<sup>15</sup> Department of Clinical Sciences in Malmö, Lund University Diabetes Centre, Scania University Hospital, Malmö, Sweden

<sup>16</sup> Copenhagen University Hospital, Steno Diabetes Center Copenhagen, Herlev, Denmark

<sup>17</sup> Department of Endocrinology, Skåne University Hospital, Malmö, Sweden

<sup>18</sup> Bioinformatics Interdepartmental Program, UCLA, Los Angeles, CA, USA

<sup>19</sup> Institute for Precision Health, David Geffen School of Medicine at UCLA, Los Angeles, CA, USA

<sup>20</sup> HealthyWeightHub, Endocrinology, Abdominal Center, Helsinki University Central Hospital and University of Helsinki, Helsinki, Finland

<sup>21</sup> Precision Medicine, School of Clinical Sciences at Monash Health, Monash University, Clayton, Victoria, Australia

\* Corresponding authors

**Supplementary Table 1.** Number of monozygotic and dizygotic twin samples of mitochondrial DNA quantity, DNA methylation, or both, in each tissue.

|         | MZ pairs<br>(individuals) | DZ pairs<br>(individuals) | MZ individuals* | DZ individuals* |
|---------|---------------------------|---------------------------|-----------------|-----------------|
| Adipose | 71 (142)                  | 4 (8)                     | 6               | 1               |
| Muscle  | 74 (148)                  | 4 (8)                     | 1               | -               |
| Total** | 81 (162)                  | 10 (2)                    | 1               | -               |

\* Twins with missing co-twin data due to failing quality control during DNA methylation or mitochondrial DNA quantity data preprocessing.

\*\* Total number of unique twin pairs or individuals with either adipose or muscle tissue sample or both available.

DZ = dizygotic; MZ = monozygotic

**Supplementary Table 2.** Epigenetic age estimates of the study cohort.

| Epigenetic clock | Tissue  | Mean (SD) ,<br>years |
|------------------|---------|----------------------|
| Horvath clock    | Adipose | -0.2 (-8.7–7.7)      |
|                  | Muscle  | -0.3 (-7.6–6.2)      |
| Hannum clock     | Adipose | -0.2 (-8.0–6.5)      |
|                  | Muscle  | -0.1 (-5.3–5.0)      |
| GrimAge          | Adipose | -0.2 (-5.8–4.1)      |
|                  | Muscle  | -0.1 (-3.7–4.0)      |
| PhenoAge         | Adipose | -0.2 (-11.5–11.8)    |
|                  | Muscle  | -0.2 (-8.1–4.6)      |
| DunedinPACE*     | Adipose | 1.7 (1.5–2.0)        |
|                  | Muscle  | 1.4 (1.2–1.5)        |
| MEAT             | Muscle  | 0.2 (-8.5–7.3)       |

\* unit: years/calendar  
year

**Supplementary Table 3.** Characteristics of the monozygotic twin pairs used in ICE FALCON analysis of SH3BP4 methylation, mtDNA quantity and obesity-related traits in adipose tissue.

| Variable                       | Heavier co-twin (mean) | Leaner co-twin (mean) | Difference (Heavier-Leaner) | P-value** | N (MZ twin pairs) |
|--------------------------------|------------------------|-----------------------|-----------------------------|-----------|-------------------|
| cg19998400* (M-value)          | 0.82                   | 0.79                  | 0.03                        | 8.0E-05   | 68                |
| mtDNAq*                        | -0.06                  | 0.02                  | -0.08                       | 7.7E-05   | 71                |
| Weight (kg)                    | 91.60                  | 77.84                 | 13.76                       | 5.4E-18   | 71                |
| BMI (kg/m2)                    | 31.93                  | 27.32                 | 4.61                        | 4.6E-19   | 71                |
| Waist circumference (cm)       | 104.38                 | 91.96                 | 12.42                       | 3.6E-17   | 64                |
| WHR                            | 0.93                   | 0.90                  | 0.04                        | 8.9E-05   | 33                |
| Fat (%)                        | 40.65                  | 35.33                 | 5.32                        | 1.4E-13   | 71                |
| Fat (kg)                       | 38.36                  | 28.79                 | 9.57                        | 3.0E-14   | 71                |
| Fat-free mass (kg)             | 51.14                  | 47.60                 | 3.55                        | 1.4E-07   | 71                |
| Intra-abdominal fat (cm3)      | 1300.57                | 625.16                | 675.42                      | 7.7E-04   | 21                |
| Subcutaneous fat (cm3)         | 5933.65                | 3739.47               | 2194.18                     | 3.8E-05   | 21                |
| Adipocyte volume (mm3)         | 615                    | 457                   | 159                         | 7.3E-08   | 60                |
| Liver fat (%)                  | 4.15                   | 1.60                  | 2.55                        | 9.9E-04   | 42                |
| Total cholesterol (mmol/l)     | 4.82                   | 4.73                  | 0.09                        | 0.47      | 71                |
| HDL (mmol/l)                   | 1.47                   | 1.64                  | -0.18                       | 1.7E-04   | 71                |
| LDL (mmol/l)                   | 3.12                   | 2.91                  | 0.22                        | 0.07      | 71                |
| Triglycerides (mmol/l)         | 1.12                   | 0.97                  | 0.16                        | 0.01      | 71                |
| hsCRP (mg/l)                   | 3.33                   | 2.31                  | 01.02                       | 0.02      | 64                |
| Adipsin (ug/l)                 | 1.21                   | 1.14                  | 0.07                        | 0.12      | 21                |
| Adiponectin (ng/l)             | 2903.00                | 3694.00               | -791.00                     | 7.7E-04   | 21                |
| ALAT (U/l)                     | 29.20                  | 24.93                 | 4.27                        | 0.03      | 71                |
| ASAT (U/l)                     | 28.94                  | 27.27                 | 1.68                        | 0.40      | 71                |
| BP (systolic) (mmHg)           | 134                    | 134                   | 0                           | 0.74      | 69                |
| BP (diastolic) (mmHg)          | 81                     | 79                    | 2                           | 0.03      | 69                |
| Fasting glucose (mmol/l)       | 5.82                   | 5.55                  | 0.27                        | 0.11      | 69                |
| Fasting insulin (mU/l)         | 9.50                   | 7.28                  | 2.22                        | 3.0E-03   | 67                |
| HOMA-IR                        | 2.52                   | 1.81                  | 0.71                        | 2.5E-03   | 64                |
| Matsuda index                  | 5.58                   | 7.76                  | -2.18                       | 7.8E-05   | 59                |
| Leisure-time physical activity | 2.91                   | 2.92                  | -0.02                       | 0.86      | 65                |
| Sports activity                | 2.59                   | 2.77                  | -0.18                       | 0.12      | 66                |
| Work activity                  | 2.45                   | 2.44                  | 0.02                        | 0.91      | 67                |
| Total activity                 | 7.98                   | 8.17                  | -0.19                       | 0.29      | 63                |
| EAAHorvath*                    | 0.14                   | -0.47                 | 0.61                        | 0.02      | 68                |
| EAAHannum*                     | 0.35                   | -0.49                 | 0.84                        | 5.5E-04   | 68                |
| EAGrim*                        | -0.43                  | -0.03                 | -0.39                       | 0.05      | 68                |
| EAPheno*                       | 0.26                   | -0.34                 | 0.60                        | 0.08      | 68                |
| DunedinPACE*                   | 1.70                   | 1.69                  | 0.00                        | 0.80      | 68                |

\* Estimates derived from adipose tissue

\*\* Paired t-test (two-tailed)

ALAT = Alanine aminotransferase; ASAT = Aspartate aminotransferase; BMI = body mass index; DZ = dizygotic; EAA = Epigenetic Age Acceleration; HOMA-IR = Homeostatic model assessment for insulin resistance; hsCRP = high-sensitivity C-reactive protein; mtDNAq = mitochondrial DNA quantity; MZ = monozygotic; WHR = waist-to-hip ratio

**Supplementary Table 4.** Results from ICE FALCON analysis between mtDNA quantity and the identified CpG sites (n = 68 monozygotic twin pairs and 4 dizygotic twin pairs) in adipose tissue.

| Formula                      | Coef*            | Model 1 |       |                | Model 2 |       |              | Model 3 |       |                | Change in coefficients |       |
|------------------------------|------------------|---------|-------|----------------|---------|-------|--------------|---------|-------|----------------|------------------------|-------|
|                              |                  | Est     | SE    | P              | Est     | SE    | P            | Est     | SE    | P              | Est                    | P     |
| mtDNAq (Y)<br>cg19998400 (X) | $\beta_{self}$   | -0.363  | 0.059 | <b>8.0E-10</b> |         |       |              | -0.384  | 0.058 | <b>3.3E-11</b> | -0.021                 | 0.492 |
|                              | $\beta_{cotwin}$ |         |       |                | 0.025   | 0.066 | 0.710        | -0.097  | 0.058 | 0.098          | -0.121                 | 0.221 |
| cg19998400 (Y)<br>mtDNAq (X) | $\beta_{self}$   | -0.510  | 0.089 | <b>8.8E-09</b> |         |       |              | -0.493  | 0.097 | <b>3.7E-07</b> | 0.014                  | 0.634 |
|                              | $\beta_{cotwin}$ |         |       |                | -0.245  | 0.074 | <b>0.001</b> | -0.048  | 0.070 | 0.491          | -0.054                 | 0.458 |
| mtDNAq (Y)<br>cg17468563 (X) | $\beta_{self}$   | -0.464  | 0.090 | <b>2.3E-07</b> |         |       |              | -0.450  | 0.090 | <b>5.6E-07</b> | 0.017                  | 0.592 |
|                              | $\beta_{cotwin}$ |         |       |                | 0.186   | 0.078 | <b>0.018</b> | 0.132   | 0.072 | 0.067          | 0.197                  | 0.095 |
| cg17468563 (Y)<br>mtDNAq (X) | $\beta_{self}$   | -0.356  | 0.075 | <b>2.2E-06</b> |         |       |              | -0.350  | 0.074 | <b>2.3E-06</b> | 0.006                  | 0.763 |
|                              | $\beta_{cotwin}$ |         |       |                | 0.103   | 0.079 | 0.191        | 0.057   | 0.063 | 0.368          | -0.046                 | 0.585 |

\*Standardized regression coefficient;  $\beta_{self}$  represents the association between twin's own X and Y variables whereas  $\beta_{cotwin}$  is the cross-twin cross-trait association i.e. the association between twin's own X variable with their co-twin's Y variable. X and Y in brackets indicate whether the variable was used as a predictor or an outcome, respectively. The p-values for models 1-3 were calculated from regression coefficients and standard errors using two-sided z-statistics. The change in coefficients was analysed using non-parametric bootstrapping. No multiple comparison adjustment was applied. Regression models were adjusted for age, sex, smoking, BMI and methylation beadchip and row. P-values<0.05 are bolded.

mtDNAq = mitochondrial DNA quantity

**Supplementary Table 5.** Results from the ICE FALCON analysis between the expression and methylation of *SH3BP4* and *DHRS3* (n=40 monozygotic twin pairs).

| Formula             | Coef*                   | Model 1 |       |         | Model 2 |       |       | Model 3 |       |         | Change in coefficients |       |
|---------------------|-------------------------|---------|-------|---------|---------|-------|-------|---------|-------|---------|------------------------|-------|
|                     |                         | Est     | SE    | P       | Est     | SE    | P     | Est     | SE    | p.val   | Est                    | P     |
| SH3BP4 ~ cg19998400 | $\beta_{\text{self}}$   | 0.261   | 0.047 | 2.0E-08 |         |       |       | 0.267   | 0.047 | 1.3E-08 | 0.006                  | 0.871 |
|                     | $\beta_{\text{cotwin}}$ |         |       |         | -0.112  | 0.064 | 0.078 | 0.014   | 0.066 | 0.833   | 0.126                  | 0.134 |
| cg19998400 ~ SH3BP4 | $\beta_{\text{self}}$   | 0.652   | 0.186 | 4.7E-04 |         |       |       | 0.717   | 0.163 | 1.0E-05 | 0.065                  | 0.494 |
|                     | $\beta_{\text{cotwin}}$ |         |       |         | 0.031   | 0.162 | 0.846 | -0.225  | 0.173 | 0.193   | -0.256                 | 0.299 |
| DHRS3 ~ cg17468563  | $\beta_{\text{self}}$   | -0.643  | 0.156 | 3.7E-05 |         |       |       | -0.657  | 0.146 | 6.7E-06 | -0.014                 | 0.822 |
|                     | $\beta_{\text{cotwin}}$ |         |       |         | -0.050  | 0.191 | 0.793 | 0.075   | 0.165 | 0.647   | 0.125                  | 0.532 |
| cg17468563 ~ DHRS3  | $\beta_{\text{self}}$   | -0.296  | 0.072 | 3.7E-05 |         |       |       | -0.306  | 0.071 | 1.5E-05 | -0.010                 | 0.696 |
|                     | $\beta_{\text{cotwin}}$ |         |       |         | -0.008  | 0.078 | 0.916 | -0.059  | 0.055 | 0.280   | -0.051                 | 0.581 |

\*Standardized regression coefficient;  $\beta_{\text{self}}$  represents the association between twin's own X and Y variables whereas  $\beta_{\text{cotwin}}$  is the cross-twin cross-trait association i.e. the association between twin's own X variable with their co-twin's Y variable. The p-values for models 1-3 were calculated from regression coefficients and standard errors using two-sided z-statistics. The change in coefficients was analysed using non-parametric bootstrapping. No multiple comparison adjustment was applied. Regression models were adjusted for age, sex and smoking.

**Supplementary Table 6.** Associations between adipose tissue *SH3BP4* methylation and obesity-related traits.

| Outcome                      | Coefficient | SE    | P-value | FDR            | N   |
|------------------------------|-------------|-------|---------|----------------|-----|
| Weight                       | 0.246       | 0.070 | 4.1E-04 | <b>0.002</b>   | 136 |
| BMI                          | 0.283       | 0.078 | 2.9E-04 | <b>0.001</b>   | 136 |
| Waist                        | 0.300       | 0.065 | 4.0E-06 | <b>3.5E-05</b> | 122 |
| WHR                          | 0.123       | 0.062 | 0.050   | 0.079          | 64  |
| Fat %                        | 0.290       | 0.062 | 2.7E-06 | <b>4.7E-05</b> | 136 |
| Fat (kg)                     | 0.318       | 0.077 | 3.4E-05 | <b>2.3E-04</b> | 136 |
| Fat-free mass                | 0.051       | 0.039 | 0.190   | 0.247          | 136 |
| Ia. Fat <sup>a</sup>         | 0.458       | 0.099 | 3.6E-06 | <b>4.1E-05</b> | 42  |
| Subcut. Fat <sup>a</sup>     | 0.352       | 0.086 | 4.5E-05 | <b>2.6E-04</b> | 42  |
| Adipocyte volume             | 0.202       | 0.079 | 0.010   | <b>0.022</b>   | 114 |
| Liver fat % <sup>a</sup>     | 0.391       | 0.080 | 1.1E-06 | <b>3.8E-05</b> | 82  |
| Total cholesterol            | 0.027       | 0.088 | 0.761   | 0.807          | 136 |
| HDL                          | -0.189      | 0.068 | 0.006   | <b>0.015</b>   | 136 |
| LDL                          | 0.059       | 0.092 | 0.523   | 0.631          | 136 |
| Triglycerides <sup>a</sup>   | 0.222       | 0.090 | 0.013   | <b>0.028</b>   | 136 |
| hsCRP <sup>a</sup>           | 0.320       | 0.081 | 7.2E-05 | <b>3.6E-04</b> | 122 |
| Adipsin                      | 0.058       | 0.146 | 0.694   | 0.759          | 42  |
| Adiponectin                  | -0.275      | 0.089 | 0.002   | <b>0.006</b>   | 42  |
| ASAT <sup>a</sup>            | 0.033       | 0.077 | 0.672   | 0.784          | 136 |
| ALAT <sup>a</sup>            | 0.095       | 0.088 | 0.282   | 0.353          | 136 |
| BP (systolic)                | 0.089       | 0.057 | 0.122   | 0.165          | 132 |
| BP (diastolic)               | 0.206       | 0.063 | 0.001   | <b>0.003</b>   | 132 |
| Fasting glucose <sup>a</sup> | 0.165       | 0.074 | 0.025   | <b>0.046</b>   | 132 |
| Fasting insulin <sup>a</sup> | 0.233       | 0.097 | 0.016   | <b>0.032</b>   | 128 |
| HOMA-IR <sup>a</sup>         | 0.250       | 0.095 | 0.009   | <b>0.021</b>   | 122 |
| Matsuda <sup>a</sup>         | -0.303      | 0.089 | 0.001   | <b>0.002</b>   | 112 |
| LTPA                         | -0.246      | 0.092 | 0.008   | <b>0.019</b>   | 124 |
| Sports activity              | -0.178      | 0.088 | 0.042   | 0.074          | 126 |
| Work activity                | 0.026       | 0.097 | 0.793   | 0.816          | 128 |
| Total activity               | -0.169      | 0.086 | 0.049   | 0.082          | 120 |
| EAAHorvath                   | 0.014       | 0.070 | 0.837   | 0.837          | 136 |
| EAAHannum                    | 0.134       | 0.070 | 0.055   | 0.080          | 136 |
| EAAGrim                      | -0.116      | 0.069 | 0.090   | 0.126          | 136 |
| EAAPheno                     | 0.026       | 0.063 | 0.678   | 0.766          | 136 |
| DunedinPACE                  | -0.156      | 0.080 | 0.053   | 0.081          | 136 |

<sup>a</sup> Log10 transformed

The p-values were calculated from regression coefficients and standard errors using two-sided z-statistics. False discovery rate (FDR) was used to adjust for multiple comparison. Regression models were adjusted for age, sex, smoking, and methylation beadchip and row. FDR<0.05 are bolded.



**Supplementary Table 7.** Associations between adipose tissue mtDNA quantity and obesity-related traits.

| Outcome                      | Coef   | SE    | P-value | FDR            | N   |
|------------------------------|--------|-------|---------|----------------|-----|
| Weight                       | -0.346 | 0.096 | 3.2E-04 | <b>0.001</b>   | 142 |
| BMI                          | -0.340 | 0.095 | 3.5E-04 | <b>0.001</b>   | 142 |
| Waist                        | -0.320 | 0.095 | 0.001   | <b>0.002</b>   | 128 |
| WHR                          | -0.175 | 0.095 | 0.066   | 0.096          | 66  |
| Fat %                        | -0.239 | 0.073 | 0.001   | <b>0.002</b>   | 142 |
| Fat (kg)                     | -0.357 | 0.091 | 9.4E-05 | <b>0.001</b>   | 142 |
| Fat-free mass                | -0.184 | 0.061 | 0.002   | <b>0.006</b>   | 142 |
| Ia. Fat <sup>a</sup>         | -0.578 | 0.117 | 7.5E-07 | <b>2.6E-05</b> | 42  |
| Subcut. Fat <sup>a</sup>     | -0.464 | 0.105 | 1.1E-05 | <b>1.2E-04</b> | 42  |
| Adipocyte volume             | -0.322 | 0.085 | 1.6E-04 | <b>0.001</b>   | 120 |
| Liver fat % <sup>a</sup>     | -0.366 | 0.123 | 0.003   | <b>0.006</b>   | 84  |
| Total cholesterol            | 0.076  | 0.087 | 0.382   | 0.432          | 142 |
| HDL                          | 0.324  | 0.089 | 2.7E-04 | <b>0.001</b>   | 142 |
| LDL                          | -0.062 | 0.092 | 0.505   | 0.535          | 142 |
| Triglycerides <sup>a</sup>   | -0.159 | 0.108 | 0.142   | 0.184          | 142 |
| hsCRP <sup>a</sup>           | -0.194 | 0.109 | 0.074   | 0.103          | 128 |
| Adipsin                      | -0.229 | 0.100 | 0.023   | <b>0.040</b>   | 42  |
| Adiponectin                  | 0.357  | 0.098 | 2.7E-04 | <b>0.001</b>   | 42  |
| ALAT <sup>a</sup>            | -0.095 | 0.099 | 0.337   | 0.393          | 142 |
| ASAT <sup>a</sup>            | -0.091 | 0.092 | 0.322   | 0.389          | 142 |
| BP (systolic)                | 0.025  | 0.074 | 0.739   | 0.761          | 138 |
| BP (diastolic)               | -0.163 | 0.085 | 0.057   | 0.086          | 138 |
| Fasting glucose <sup>a</sup> | -0.097 | 0.085 | 0.258   | 0.322          | 138 |
| Fasting insulin <sup>a</sup> | -0.296 | 0.103 | 0.004   | <b>0.009</b>   | 134 |
| HOMA-IR <sup>a</sup>         | -0.355 | 0.093 | 1.4E-04 | <b>0.001</b>   | 128 |
| Matsuda <sup>a</sup>         | 0.345  | 0.095 | 2.8E-04 | <b>0.001</b>   | 118 |
| LTPA                         | 0.183  | 0.094 | 0.051   | 0.080          | 130 |
| Sports activity              | 0.260  | 0.101 | 0.010   | <b>0.020</b>   | 132 |
| Work activity                | -0.068 | 0.092 | 0.458   | 0.501          | 134 |
| Total activity               | 0.194  | 0.093 | 0.038   | 0.063          | 126 |
| EAAHorvath                   | -0.176 | 0.073 | 0.016   | <b>0.030</b>   | 136 |
| EAAHannum                    | -0.273 | 0.072 | 1.4E-04 | <b>0.001</b>   | 136 |
| EAAGrim                      | 0.145  | 0.091 | 0.110   | 0.148          | 136 |
| EAAPheno                     | -0.252 | 0.054 | 3.2E-06 | <b>5.5E-05</b> | 136 |
| DunedinPACE                  | -0.004 | 0.094 | 0.964   | 0.964          | 136 |

<sup>a</sup> Log10 transformed

The p-values were calculated from regression coefficients and standard errors using two-sided z-statistics. False discovery rate (FDR) was used to adjust for multiple comparison. Regression models were adjusted for age, sex and smoking. FDR<0.05 are bolded.

**Supplementary Table 8.** Participant characteristics of the two validation cohorts.

|                                           | TwinsUK                                              | Scandinavian T2D-discordant<br>MZ twin cohort |
|-------------------------------------------|------------------------------------------------------|-----------------------------------------------|
| N (twin pairs, singletons)                | 766* (318, 130)                                      | 28 (14, 0)                                    |
| MZ, DZ full twin pairs                    | 131, 187                                             | 14, 0                                         |
| Age (years), mean (range)                 | 59.3 (38.7–84.6)                                     | 68.1 (54-80)                                  |
| Female, %                                 | 100                                                  | 35.7                                          |
| Smoking, %                                | Never 56.7<br>Former 32.4<br>Current 10.1<br>NA: 0.9 | Yes 10.7<br>No 53.6<br>NA 35.7                |
| BMI (kg/m <sup>2</sup> ), mean (range) SD | 26.6 (16.2–47.1) 4.9                                 | 30.7 (22.3–45.6) 7.0                          |

\* Out of which, 535 had DNA methylation data and 765 RNA expression data

DZ = dizygotic; MZ = monozygotic; T2D = type 2 diabetes; NA = not applicable

**Supplementary Table 9.** Results from the replication analysis.

| cg19998400 ~ mtDNA quantity |       |                |                                   |              |                  |
|-----------------------------|-------|----------------|-----------------------------------|--------------|------------------|
| Effect                      | SE    | P.value        | N, individuals (full MZ,DZ pairs) | Cohort       | Smoking-adjusted |
| -0.120                      | 0.056 | <b>0.032</b>   | 28 (14,0)                         | Scandinavian | No               |
| -0.185                      | 0.029 | <b>3.7E-10</b> | 16 (8,0)                          |              | Yes              |
|                             |       |                |                                   |              |                  |
| cg19998400 ~ BMI            |       |                |                                   |              |                  |
| Effect                      | SE    | P.value        | N, individuals (full MZ,DZ pairs) | Cohort       | Smoking-adjusted |
| 0.003                       | 0.008 | 0.722          | 28 (14,0)                         | Scandinavian | No               |
| 0.004                       | 0.012 | 0.703          | 16 (8,0)                          |              | Yes              |
| 0.061                       | 0.008 | <b>1.3E-12</b> | 535 (79,112)                      | TwinsUK      | Yes              |
| cg19998400 ~ SH3BP4         |       |                |                                   |              |                  |
| Correlation coefficient     |       | P.value        | N, individuals (full MZ,DZ pairs) | Cohort       |                  |
| 0.094                       |       | 0.662          | 24 (12,0)                         | Scandinavian |                  |
| 0.201                       |       | <b>3.0E-6</b>  | 534 (79,111)                      | TwinsUK      |                  |
| SH3BP4 ~ BMI                |       |                |                                   |              |                  |
| Effect                      | SE    | P.value        | N, individuals (full MZ,DZ pairs) | Cohort       | Smoking-adjusted |
| 0.001                       | 0.005 | 0.907          | 24 (12,0)                         | Scandinavian | No               |
| 0.010                       | 0.007 | 0.146          | 14 (7,0)                          |              | Yes              |
| 0.072                       | 0.007 | <b>1.1E-22</b> | 765 (131,186)                     | TwinsUK      | No               |

In addition to smoking status, the linear models were adjusted for age, sex, cohort-specific technical covariates, and family structure and the association assessed with two-tailed hypothesis testing. The correlation between cg19998400 and *SH3BP4* that was determined using the two-tailed Pearson correlation coefficient. P-values<0.05 are bolded.

*SH3BP4* = expression of *SH3BP4*

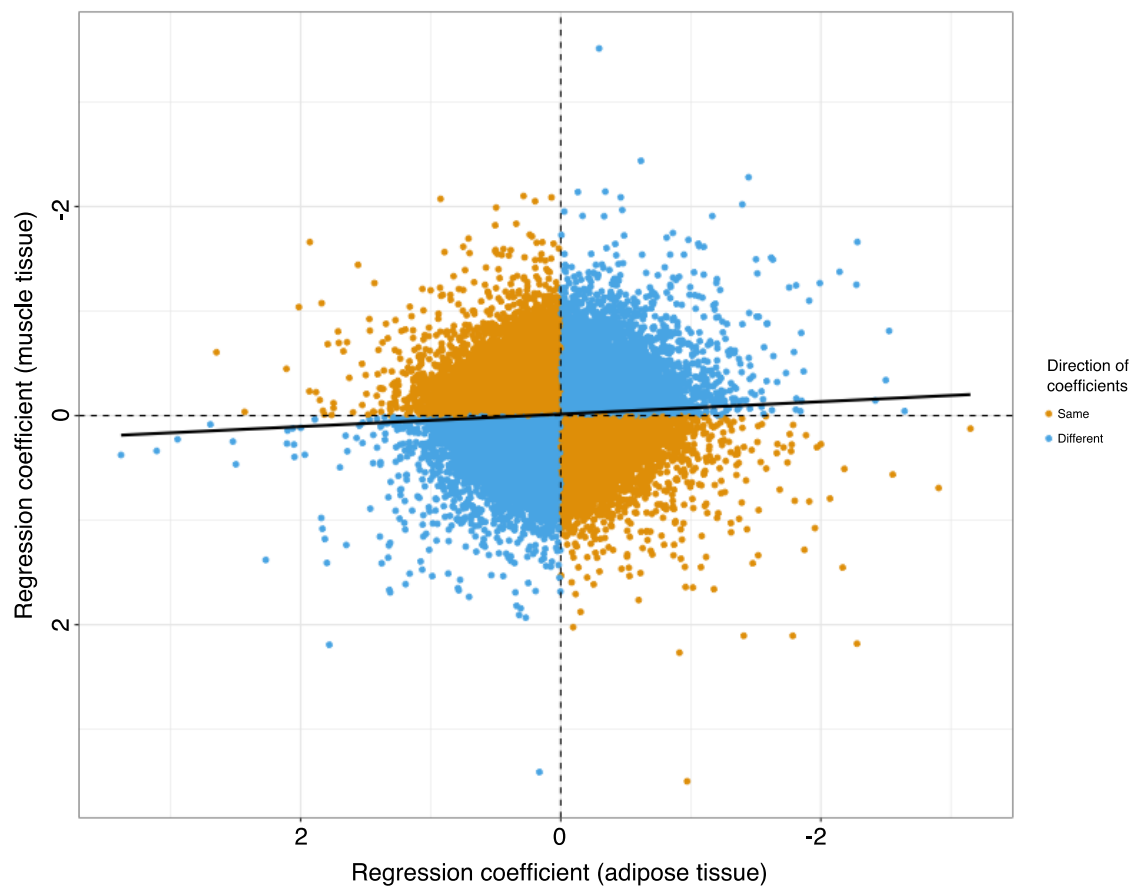

Supplementary Figure 1. **Scatter plot representing the regression coefficients from EWAS on mtDNA quantity in adipose tissue (X) and skeletal muscle (Y).** The black line represents the fitted linear regression line. Yellow points represent CpGs where the regression coefficient had the same direction in both adipose and muscle, whereas blue points indicate CpGs where the direction differed between the two tissues.

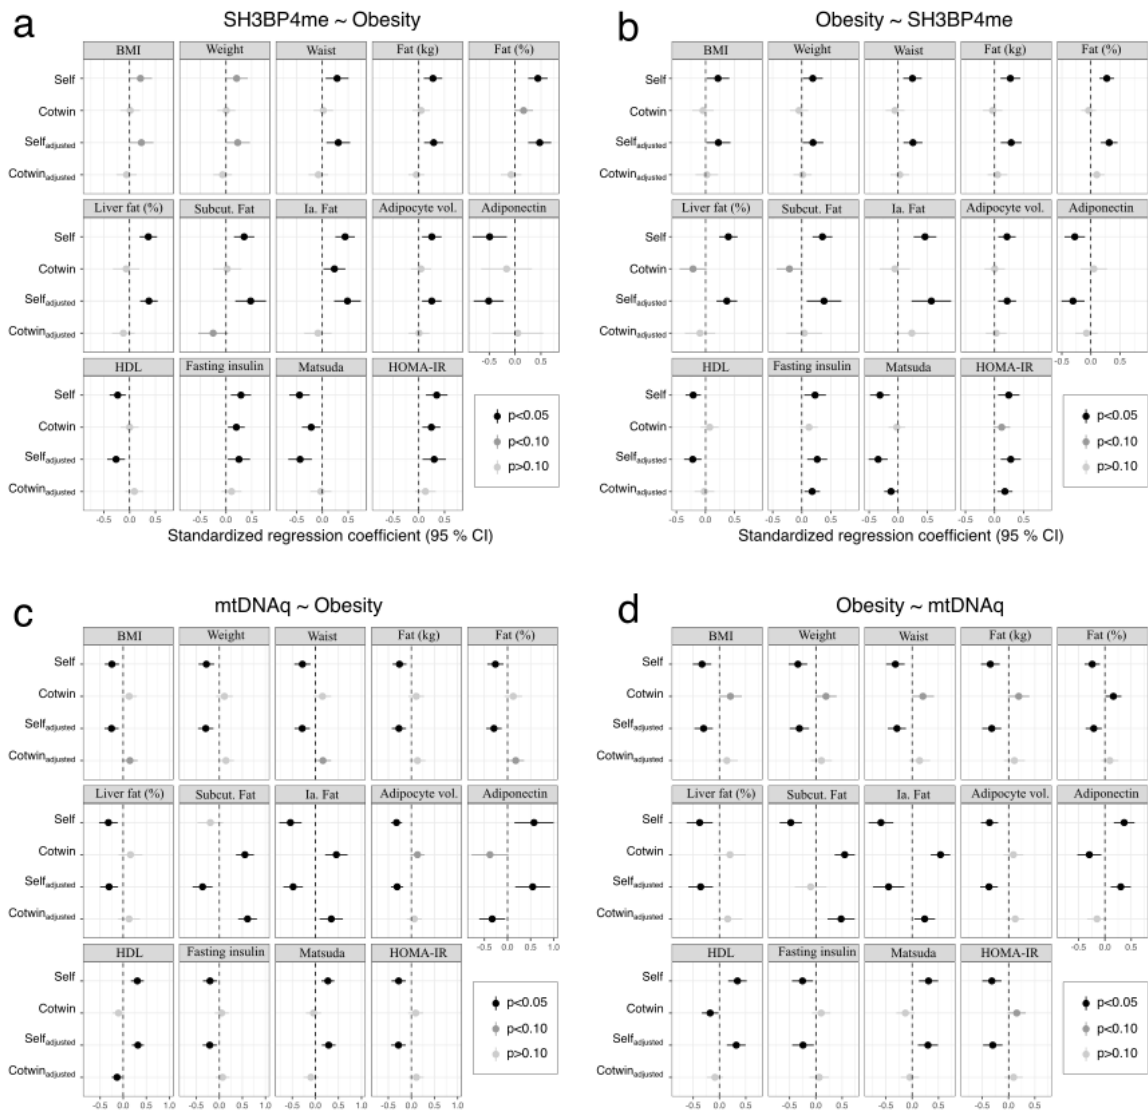

Supplementary Figure 2. **Results from the ICE FALCON analysis, including both monozygotic and dizygotic twin pairs, between adipose tissue mtDNA quantity, *SH3BP4* methylation and obesity-related outcomes. a-d** Point estimates for the standardized regression coefficients and their 95% confidence intervals for the ICE FALCON analysis of **a** obesity-related outcomes regressed against *SH3BP4* methylation, **b** *SH3BP4* methylation regressed against obesity-related outcomes, **c** obesity-related outcomes regressed against mtDNA quantity and **d** mtDNA quantity regressed against obesity-related outcomes. The p-values were calculated from regression coefficients and standard errors using two-sided z-

statistics. No multiple comparison adjustment was applied. Source data with the exact p-values are provided as a Source Data file.

**a-b** N (BMI, HDL, Weight) = 72 pairs, N (Fat %, Fat kg) = 71 pairs, (Fasting insulin) = 68 pairs, N (HOMA-IR, Waist) = 65 pairs, N (Adipocyte vol., Matsuda) = 60 pairs, N (Liver fat %) = 41 pairs, N (Adiponectin, la. Fat, Subcut. Fat) = 21 pairs

**c-d** N (BMI, HDL, Weight) = 75 pairs, N (Fat %, Fat kg) = 74 pairs, (Fasting insulin) = 71 pairs, N (HOMA-IR, Waist) = 68 pairs, N (Adipocyte vol., Matsuda) = 63 pairs, N (Liver fat %) = 42 pairs, N (Adiponectin, la. Fat, Subcut. Fat) = 21 pairs

‘Self’ represents the association between twin’s own X and Y variables whereas ‘Cotwin’ is the cross-twin cross-trait association i.e. the association between twin’s own X variable with their co-twin’s Y variable. ‘Adjusted’ refers to the regression coefficients derived from the ICE FALCON Model 3 that includes both twin’s own and their cotwin’s X variables.

HDL = high-density lipoprotein; la. = intra-abdominal; mtDNAq = mitochondrial DNA quantity, Subcut. = subcutaneous

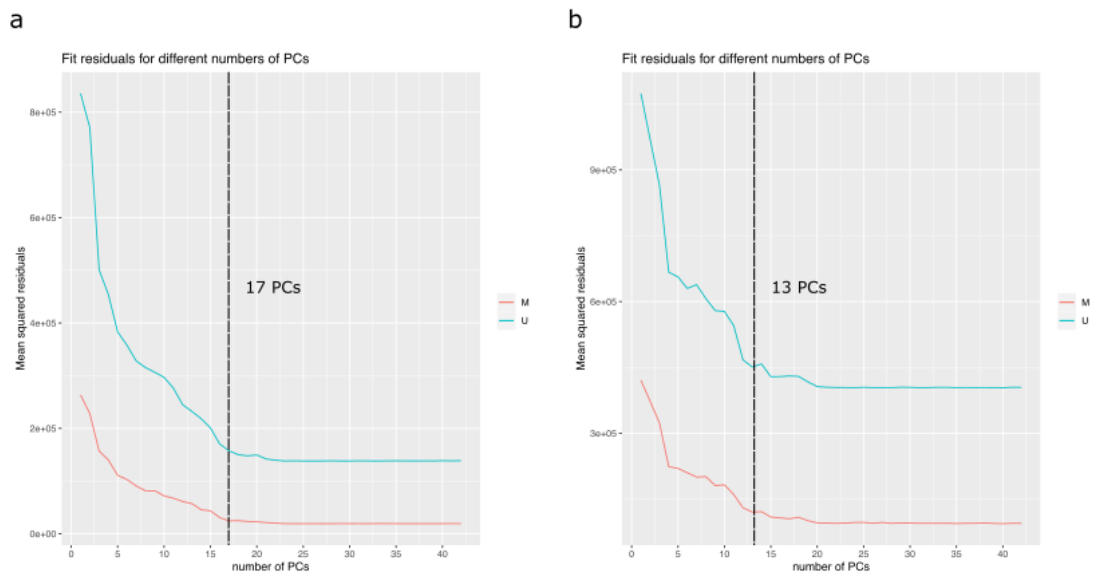

Supplementary Figure 3. **The amount of methylation probe quantile variation unexplained by the control probe principal components under 10-fold cross validation in a adipose tissue and b skeletal muscle.** The number of principal components which the probe quantiles were normalized with is indicated in the plots using a dotted vertical line.

M = methylated probes; U = unmethylated probes

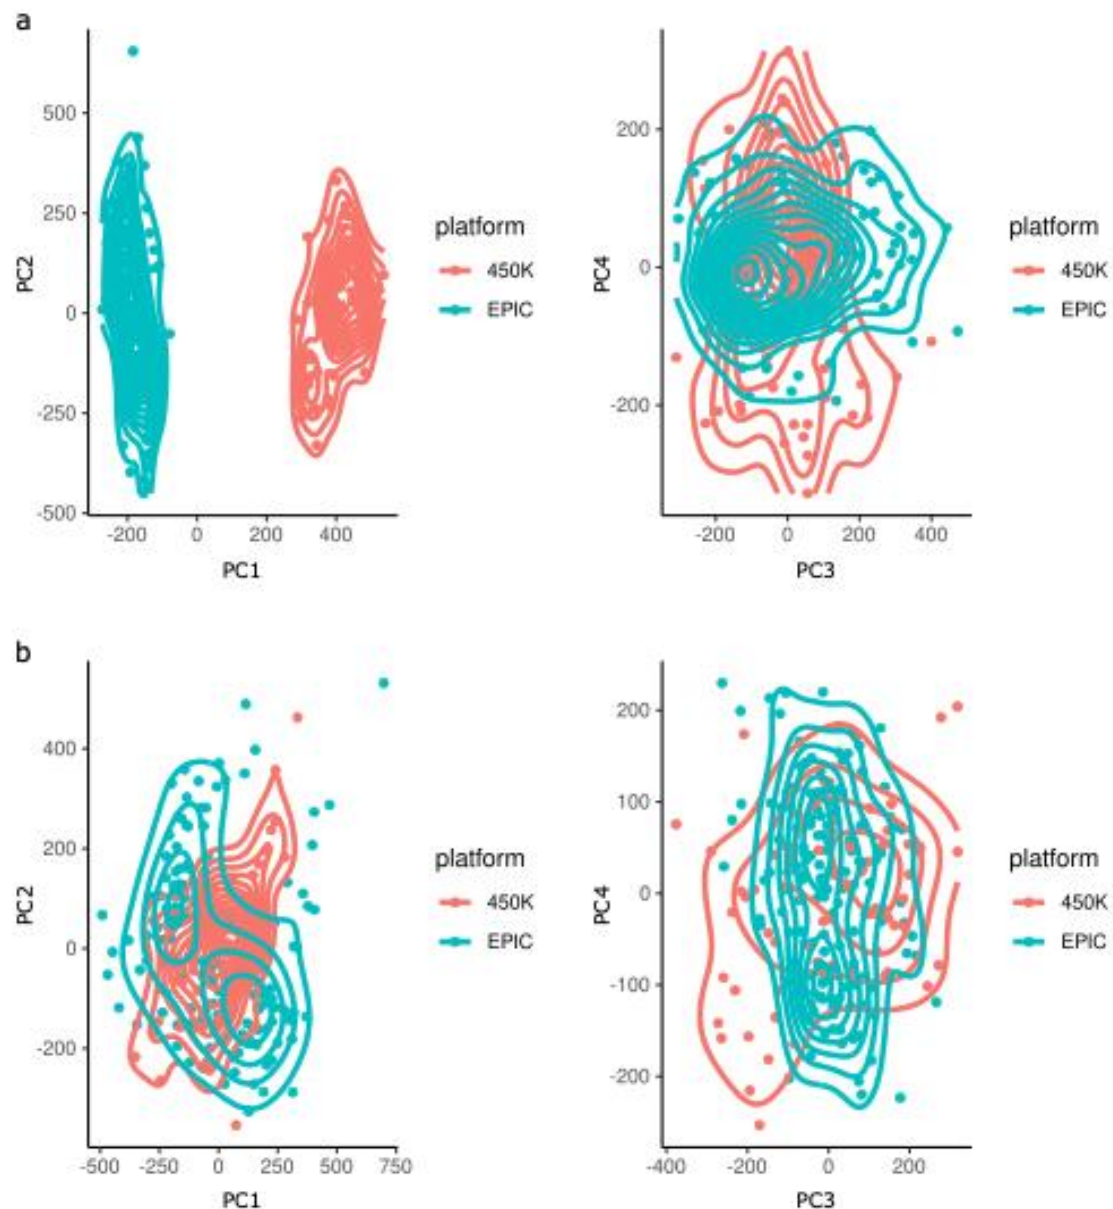

Supplementary Figure 4. **First four principal components of the adipose tissue DNA methylation data indicated by beadchip type (450K/EPIC), a before and b after adjustment with *ComBat*.** Each dot represents a methylation sample, and the circles present two-dimensional kernel density estimates. Red color indicates samples from 450K platform and blue from EPIC platform.
